# Supplementary material for: Influence of side-chain interactions on the self-assembly of discotic tricarboxyamides: a crystallographic insight
Source: Royal Society of Chemistry journal article supplement (doi:10.1039/c5ra03864b), 2015-01-01
Supplement: c5ra03864b1.pdf [file c5ra03864b1.pdf]

# **Influence of side-chains interactions on the self-assembly of discotic tricarboxyamides: A crystallographic insight†**

Arpita Paikar, Apurba Pramanik and Debasish Haldar\*

Department of Chemical Sciences, Indian Institute of Science Education and Research –

Kolkata, Mohanpur, Nadia, West Bengal – 741252, India.

E-mail: deba\_h76@yahoo.com

## **Table of contents**

|            |          |
|------------|----------|
| Table 1    | <b>2</b> |
| Figure S1  | <b>3</b> |
| Figure S2  | <b>4</b> |
| Figure S3  | <b>5</b> |
| Figure S4  | <b>6</b> |
| Figure S5  | <b>6</b> |
| Figure S6  | <b>7</b> |
| Figure S7  | <b>7</b> |
| Figure S8  | <b>8</b> |
| Figure S9  | <b>8</b> |
| Figure S10 | <b>9</b> |

Table-1: Geletion study

| Solvents            | Compound-1 (mg/ml) | Compound-2 (mg/ml) |
|---------------------|--------------------|--------------------|
| Toluene             | P (27.5mg)         | G (20.7mg)         |
| O-Xylene            | P (25.9mg)         | G (20.2mg)         |
| M-Xylene            | P (27.2mg)         | G (20.5mg)         |
| P-Xylene            | P (25.1mg)         | G (19.9mg)         |
| Benzene             | P (25.5mg)         | G (24.8mg)         |
| Chlorobenzene       | P (24.8mg)         | G (20.4mg)         |
| 1,2-Dichlorobenzene | P (25.5mg)         | G (19.9mg)         |
| Hexane              | NS                 | NS                 |
| Petrol              | P                  | P                  |
| Diesel              | P                  | P                  |
| Kerosene            | P                  | P                  |

P = precipitate, NS = insoluble, G = gel

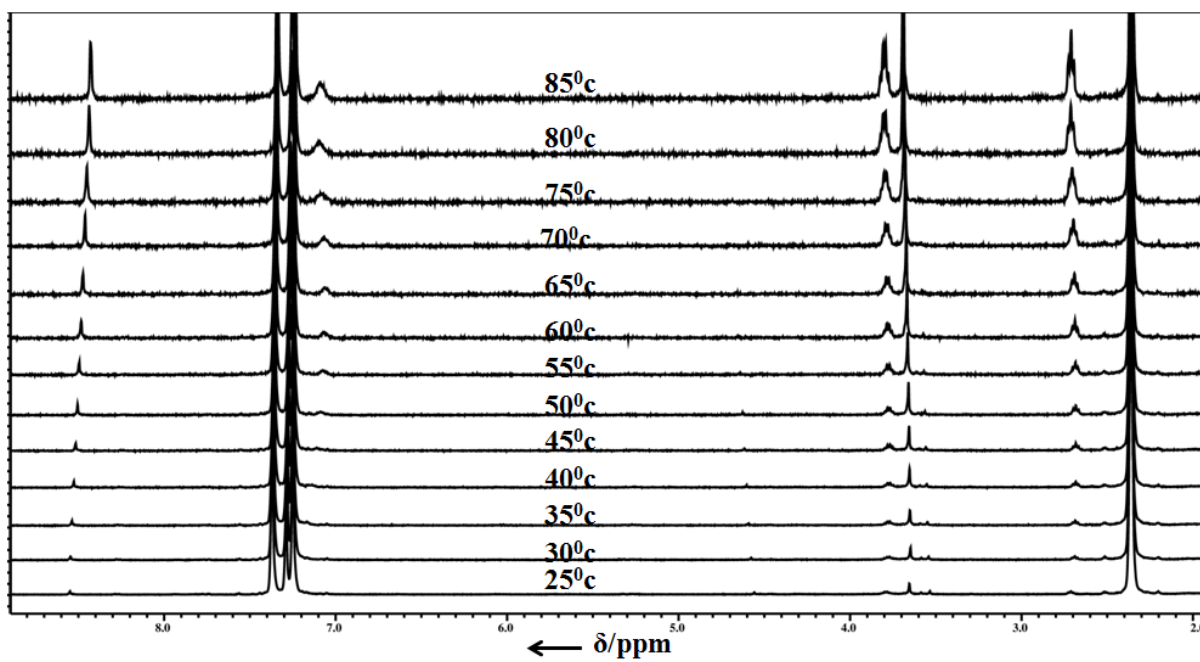

**Figure S1** Part of the <sup>1</sup>H NMR spectra of tricarboxamide **1** in toluene-*D*<sub>8</sub> with increasing temperature.

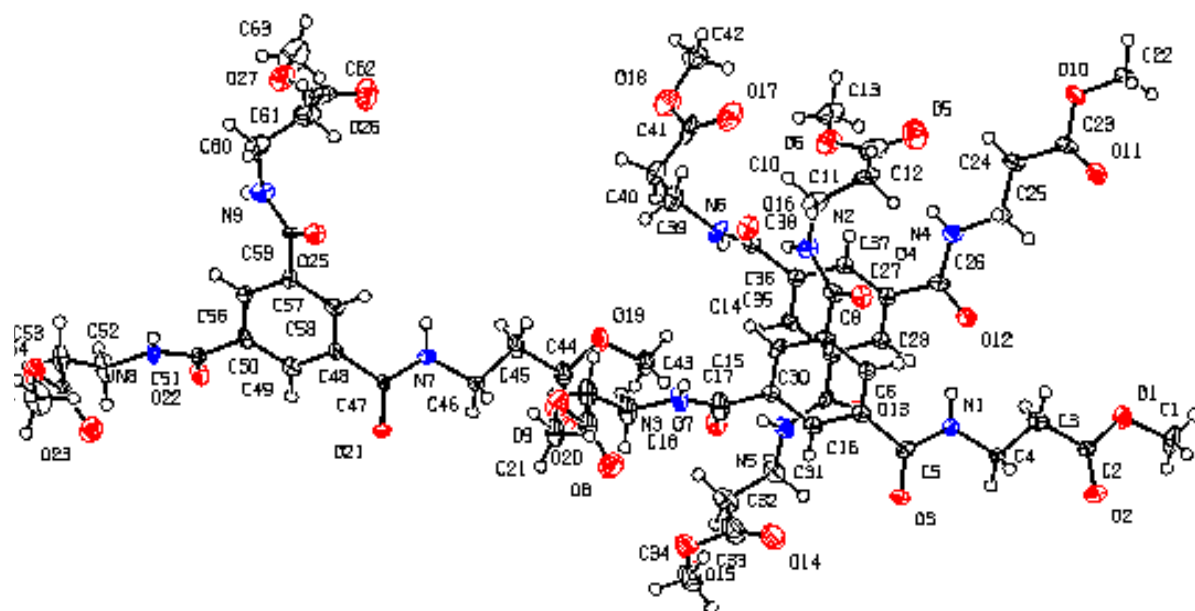

**Figure S2:** ORTEP diagram of 1. Ellipsoids are drawn at the 50 % probability level.

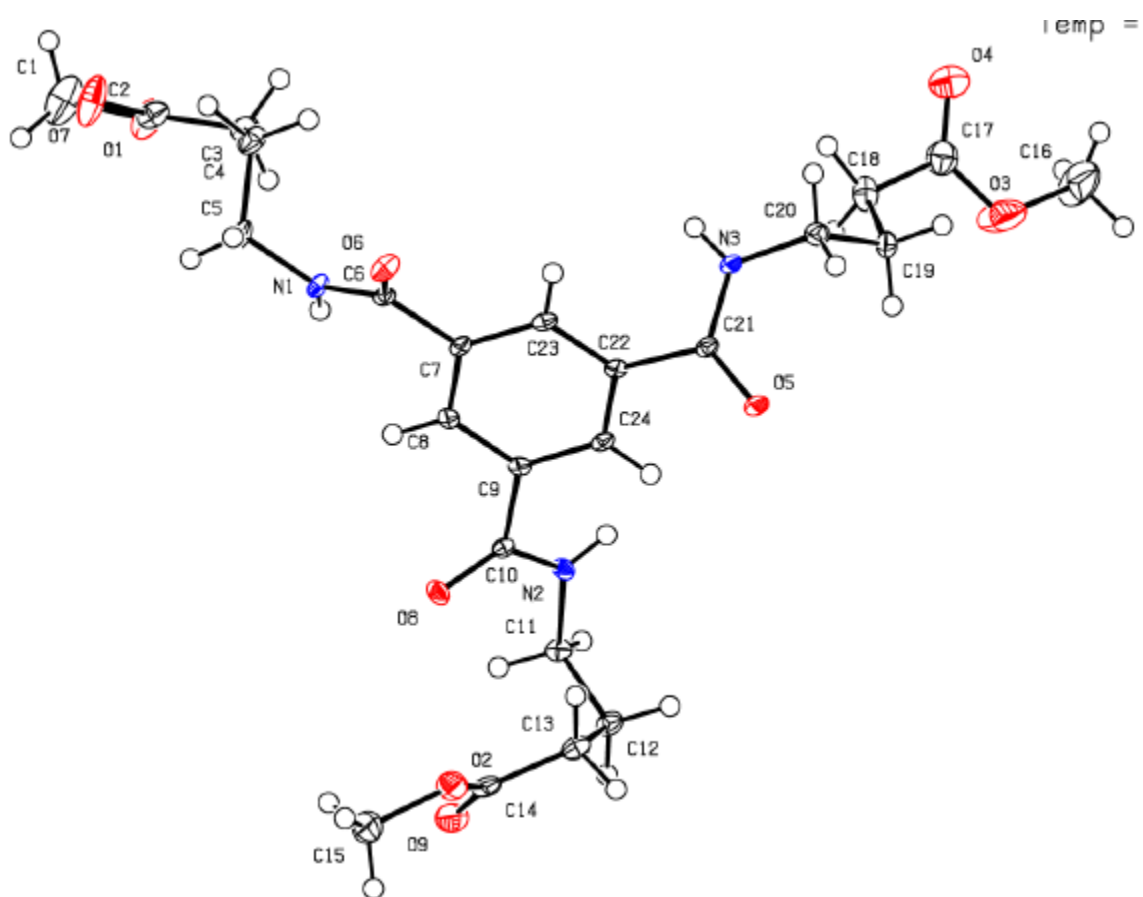

**Figure S3:** ORTEP diagram of 2. Ellipsoids are drawn at the 50 % probability level.

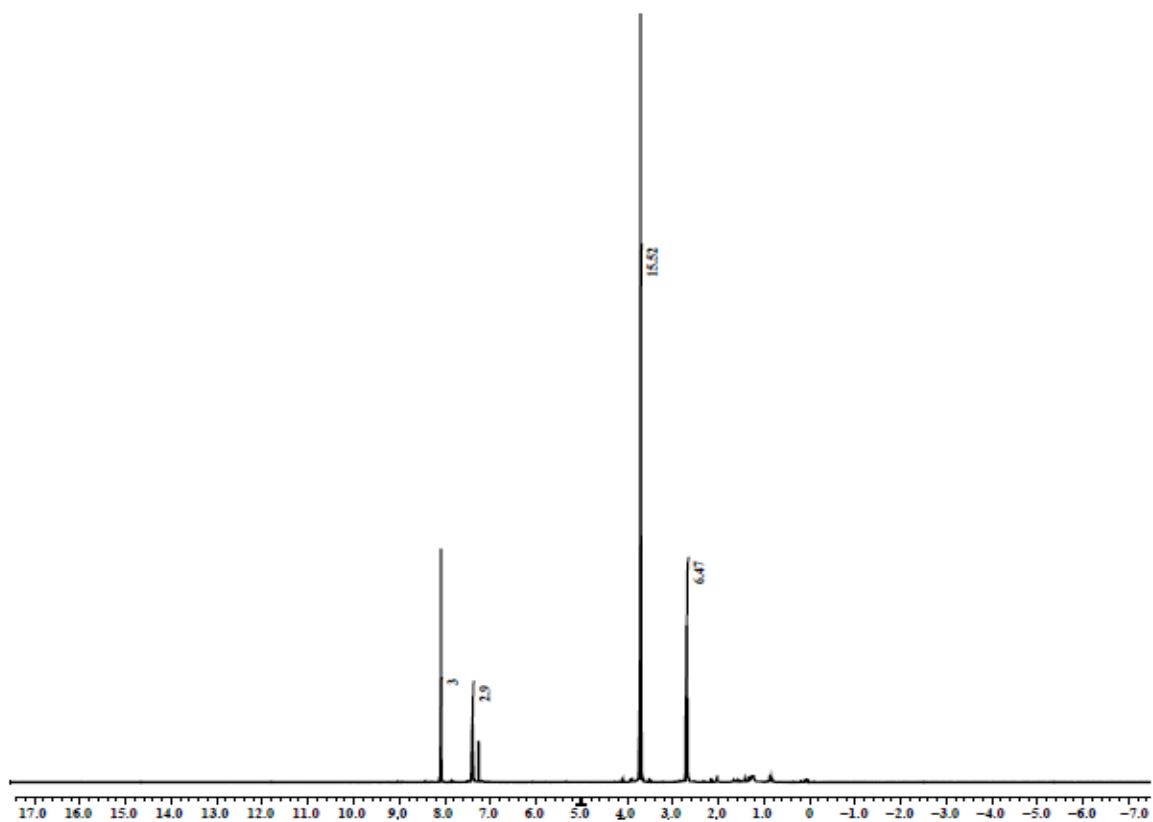

**Figure S4:**  $^1\text{H}$  NMR spectra (400 MHz,  $\text{CDCl}_3$ ,  $\delta$  in ppm) of tricarboxamide **1**.

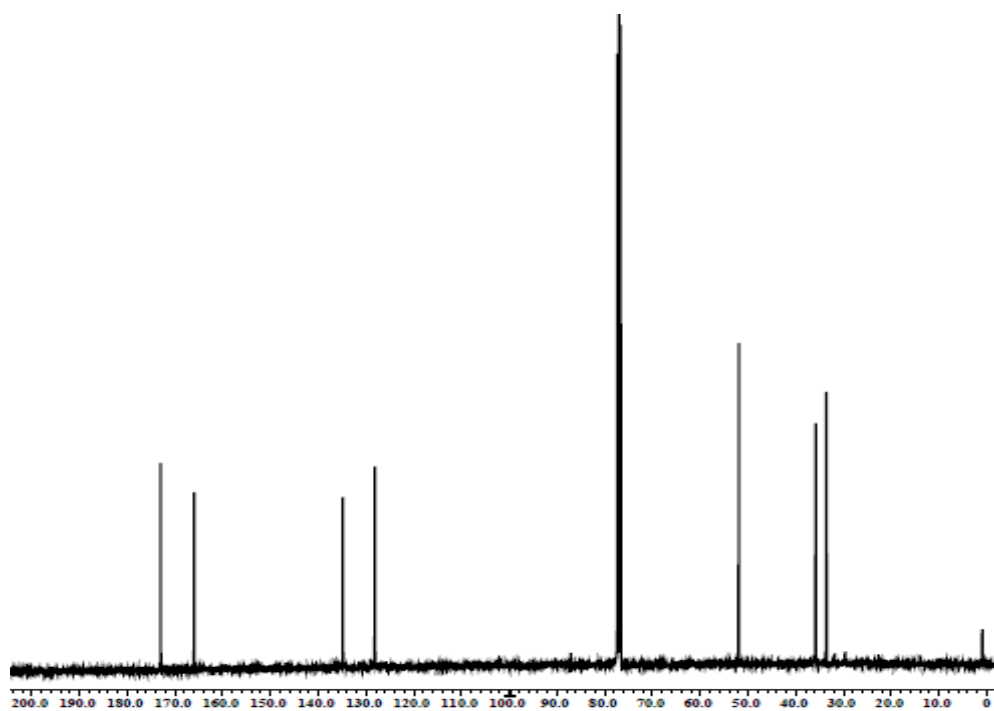

**Figure S5:**  $^{13}\text{C}$  NMR spectra (100 MHz,  $\text{CDCl}_3$ ,  $\delta$  in ppm) of tricarboxamide **1**.

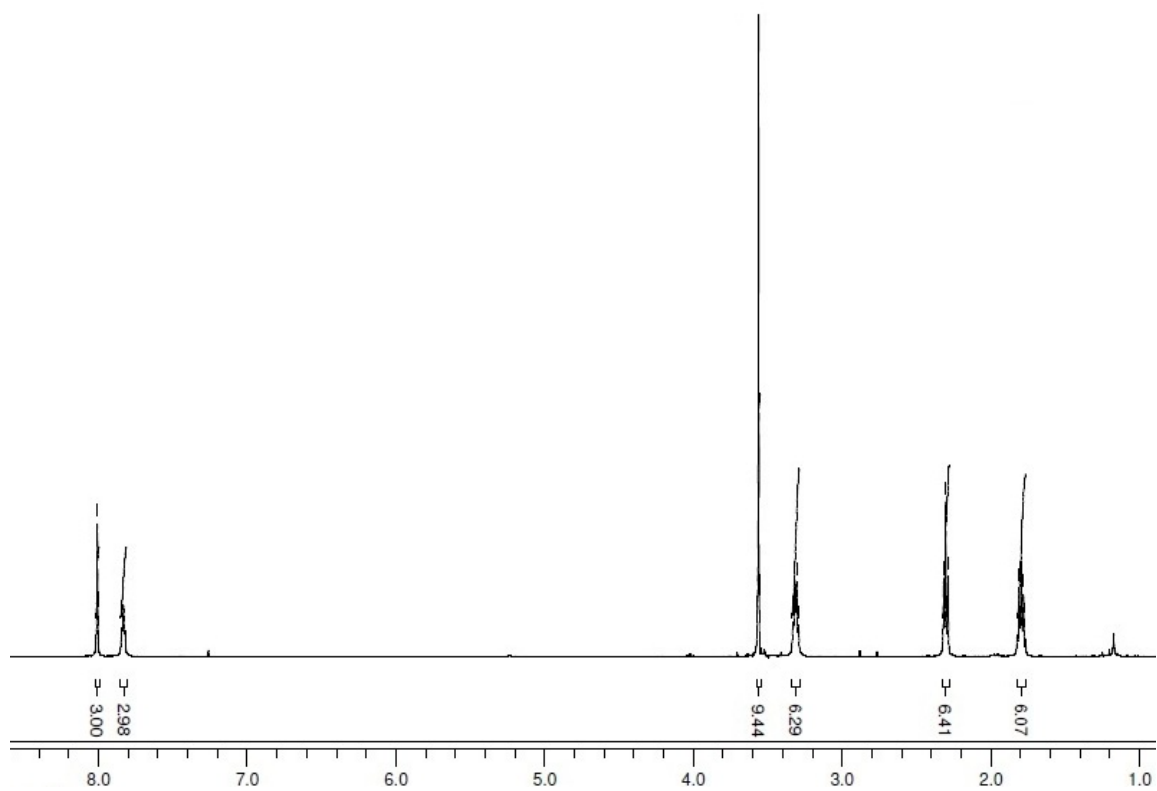

**Figure S6:**  $^1\text{H}$  NMR spectra (500 MHz,  $\text{CDCl}_3$ ,  $\delta$  in ppm) of tricarboxamide **2**.

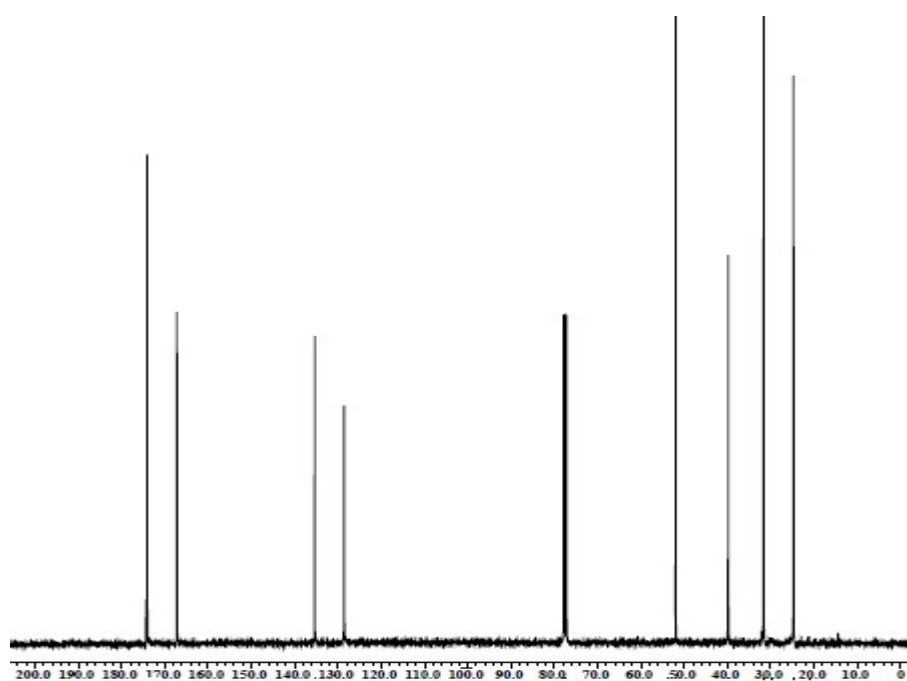

**Figure S7:**  $^{13}\text{C}$  NMR spectra (125 MHz,  $\text{CDCl}_3$ ,  $\delta$  in ppm) of tricarboxamide **2**.

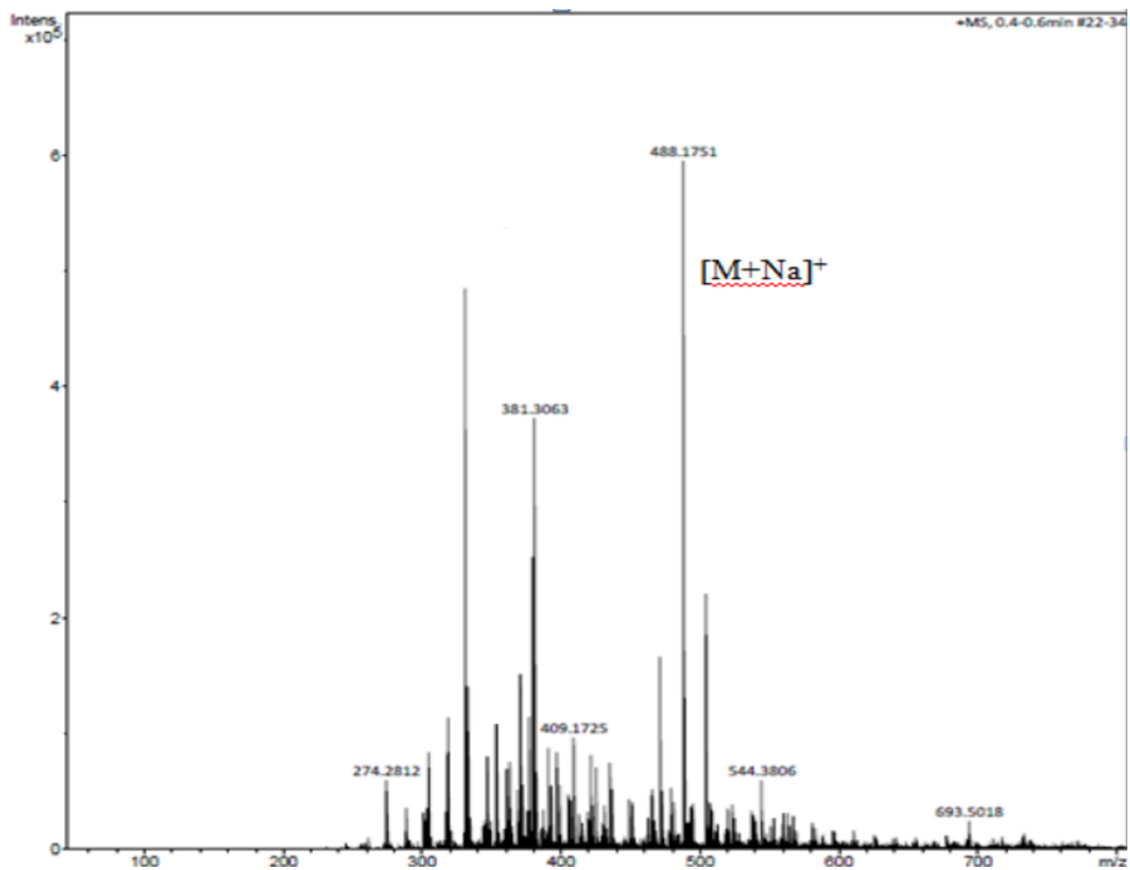

**Figure S8:** Mass spectra of tricarboxamide 1.

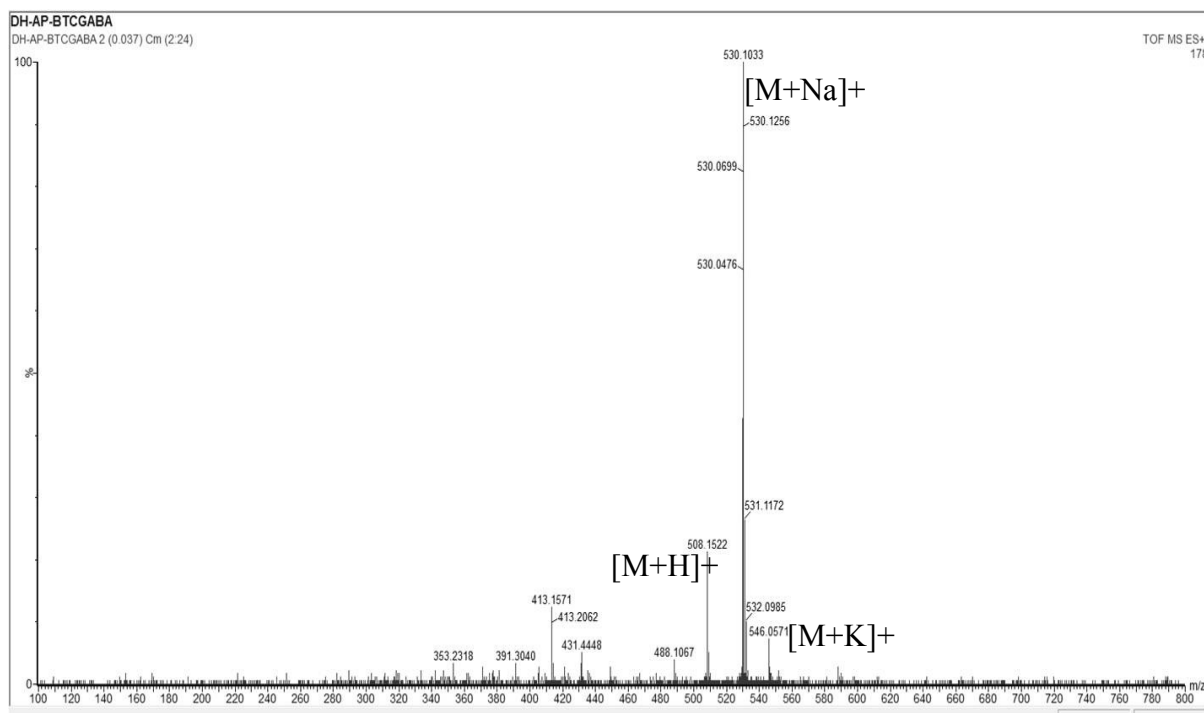

**Figure S9:** Mass spectra of tricarboxamide 2.



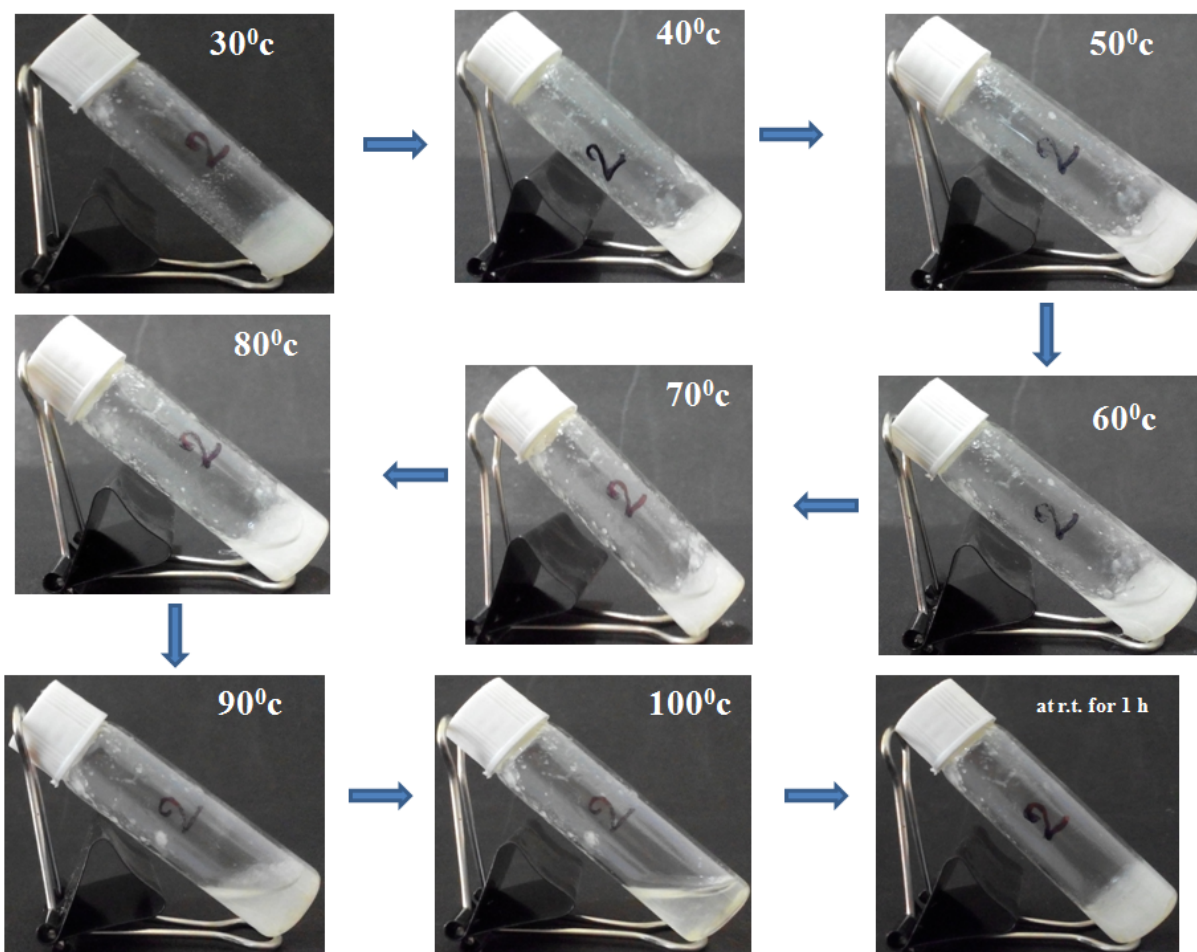

**Figure S10:** Thermoreversible gel of tricarboxyamide 2.
